# Supplementary material for: The formin inhibitor SMIFH2 inhibits members of the myosin superfamily
Source: Oxford University Press journal article supplement (doi:10.1242/jcs.253708), 2021-02-15
Supplement: jcs253708supp.pdf [file jcs253708supp.pdf]

**Table S1**

(1) P values in Figure 1B

|             | SMIFH <sub>2</sub> | pAB      |
|-------------|--------------------|----------|
| Non-treated | < 0.0001           | < 0.0001 |

(2) P values in Figure 1D

|             | 30µM SMIFH <sub>2</sub> | 50µM SMIFH <sub>2</sub> | 100µM SMIFH <sub>2</sub> | 200µM SMIFH <sub>2</sub> | 100µM pAB |
|-------------|-------------------------|-------------------------|--------------------------|--------------------------|-----------|
| Non-treated | 0.0030                  | < 0.0001                | < 0.0001                 | < 0.0001                 | < 0.0001  |
| 100µM pAB   | < 0.0001                | < 0.0001                | 0.0003                   | 0.0107                   |           |

(3) P values in Figure 2G

|             | 12.5µM SMIFH <sub>2</sub> | 25µM SMIFH <sub>2</sub> | 50µM SMIFH <sub>2</sub> |
|-------------|---------------------------|-------------------------|-------------------------|
| Non-treated | 0.0002                    | < 0.0001                | < 0.0001                |

(4) P values in Figure 2H

|             | 12.5µM SMIFH <sub>2</sub> | 25µM SMIFH <sub>2</sub> | 50µM SMIFH <sub>2</sub> | 100µM SMIFH <sub>2</sub> | 100µM SMIFH <sub>2</sub> | 100µM pAB |
|-------------|---------------------------|-------------------------|-------------------------|--------------------------|--------------------------|-----------|
| Non-treated | 0.0002                    | < 0.0001                | < 0.0001                | < 0.0001                 | < 0.0001                 | < 0.0001  |
| 100µM pAB   | < 0.0001                  | < 0.0001                | 0.2153                  | 0.0009                   | 0.7841                   |           |

**Table S2**

|                   | <b>0 <math>\mu</math>M SMIFH2</b> | <b>100 <math>\mu</math>M SMIFH2</b> |
|-------------------|-----------------------------------|-------------------------------------|
| <b>Time, min.</b> | <b>% phosphorylated</b>           | <b>% phosphorylated</b>             |
| 0.5               | 50.8                              | 55.4                                |
| 1.5               | 71.2                              | 70.4                                |
| 4.5               | 82.1                              | 81.2                                |

**Table S2:** SMIFH2 has no effect on myosin light chain kinase. Nonmuscle myosin 2A was incubated with myosin light chain kinase in the presence or absence of 100  $\mu$ M SMIFH2 for the indicated times. The extent of phosphorylation was quantified by mass spectrometry (Apffel et al., 1995; Taggart et al., 2000).

**Table S3**

| <b>Myosin</b>                      | <b>IC<sub>50</sub> (<math>\mu</math>M SMIFH2)</b> |
|------------------------------------|---------------------------------------------------|
| <b>Human non-muscle Myo2A</b>      | <b>50</b>                                         |
| <b>Rabbit skeletal muscle Myo2</b> | <b>30</b>                                         |
| <b>Drosophila Myo7A</b>            | <b>30</b>                                         |
| <b>Bovine Myo10</b>                | <b>15</b>                                         |
| <b>Drosophila Myo5</b>             | <b>2</b>                                          |

**Table S3:** Recapitulation of IC<sub>50</sub> for the various myosin types we probed in this work
